# Supplementary material for: Exposure and Early Effect Biomarkers for Risk Assessment of Occupational Exposure to Formaldehyde: A Systematic Review
Source: MDPI journal article supplement (doi:10.3390/su16093631), 2024-04-26
Supplement: s1 [file s1]

Archive with 1 entries (1 files):
- sustainability-2964876-supplementary.pdf
